---

1 **Sublethal effects of the neonicotinoid insecticide thiamethoxam on**  
2 **the transcriptome of the honeybee (*Apis mellifera*)**

3 **Teng-Fei Shi<sup>1,2</sup>\*, Yu-Fei Wang<sup>1</sup>, Lei Qi<sup>2</sup>, Fang Liu<sup>2</sup>, Lin-Sheng Yu<sup>2</sup>**

4 <sup>1</sup> School of Plant Protection, Anhui Agricultural University, Hefei 230036, China;

5 <sup>2</sup> School of Animal Science and Technology, Anhui Agricultural University, Hefei 230036,  
6 China;

7 \* Correspondence: stf0623@163.com; Tel./Fax: +86-0551-65782158  
8

9 **Running title: Neonicotinoids in the honeybee**

10 **Abstract:** Neonicotinoid insecticides are now the most widely used insecticides in the world.  
11 Previous studies have indicated that sublethal doses of neonicotinoids impair learning, memory  
12 capacity, foraging and immunocompetence in honeybees (*Apis mellifera*). Despite this, few  
13 studies have been carried out on the molecular effects of neonicotinoids. In this study, we focus on  
14 the second-generation neonicotinoid thiamethoxam, which is currently widely used in agriculture  
15 to protect crops. Using high-throughput RNA-Seq, we investigated the transcriptome profile of  
16 honeybees after subchronic exposure to thiamethoxam (10 ppb) over 10 days. In total, 609  
17 differentially-expressed genes (DEGs) were identified, of which 225 were up-regulated and 384  
18 were down-regulated. The functions of some DEGs were identified, and GO enrichment analysis  
19 showed that the enriched DEGs were mainly linked to metabolism, biosynthesis and translation.  
20 KEGG pathway analysis showed that thiamethoxam affected biological processes including  
21 ribosomes, the oxidative phosphorylation pathway, tyrosine metabolism pathway, pentose and  
22 glucuronate interconversions and drug metabolism. Overall, our results provide a basis for  
23 understanding the molecular mechanisms of the complex interactions between neonicotinoid  
24 insecticides and honeybees.

25 **Key words:** Thiamethoxam; honeybees (*Apis mellifera*); RNA-Seq; differential gene expression

26 **Summary statement:** *NRI*, *Cyp6as5*, *nAChRa9* and *nAChRβ2* were up-regulated in honeybees  
27 exposed to thiamethoxam, while *CSP3*, *Obp21*, *defensin-1*, *Mrjp1*, *Mrjp3* and *Mrjp4* were  
28 down-regulated.

29

---

30 **1. Introduction**

31 Honeybees (*Apis mellifera*, L.) have a high social and economic value since they produce  
32 various substances such as honey and also play an important role in pollination and agricultural

---

33 production (Breeze *et al.*, 2011). In recent years, attention has been paid to the large decrease to  
34 global apiculture (Neumann and Carreck, 2010; Potts *et al.*, 2010; Van Engelsdorp *et al.*, 2010;  
35 Chauzat *et al.*, 2013) but the reasons are still poorly understood. Recent studies have however  
36 suggested that the decrease could be due to the widespread use of insecticides (Johnson *et al.*,  
37 2010; Goulson *et al.*, 2015; Schmuck and Lewis, 2016).

38 Recently, there have been far-reaching changes in the insecticide market. Many of the  
39 traditional insecticides, *e.g.* organophosphorus and pyrethroids, have been replaced by systemic  
40 insecticides, especially neonicotinoids. Neonicotinoids act on the insect nervous system mainly  
41 through agonistic action on nicotinic acetylcholine receptors (nAChRs) (Brown *et al.*, 2006), and  
42 since they have low mammalian toxicity (Tomizawa and Casida, 2005) they are widely used for  
43 controlling insect pests. Neonicotinoids are commonly applied as seed coatings or as foliar sprays  
44 on crops. Once absorbed into the plant, neonicotinoids can translocate to dew drops, nectar and  
45 pollen of crops during floescence (Krupke *et al.*, 2012; Stoner and Eitzer, 2012). The  
46 contaminated nectar and pollen may be consumed by foragers (Goulson, 2013) or taken to the nest  
47 for long-term storage where they are eaten by the young adults and larvae (DeGrandi-Hoffman *et al.*,  
48 2000; Cresswell, 2011). Recent studies have detected various neonicotinoids in bee products,  
49 *e.g.* honey, pollen and beeswax (Stoner and Eitzer, 2012; Codling *et al.*, 2016; Sánchez-Hernández  
50 *et al.*, 2016), meaning that the neonicotinoids can have chronic effects.

51 Even though several neonicotinoids, including thiamethoxam, imidacloprid and clothianidin,  
52 have been found to be highly toxic to honeybees (Laurino *et al.*, 2011), they are not acutely lethal  
53 at field levels (Blacquièrre *et al.*, 2012). Nevertheless, there are considerable chronic and sublethal  
54 effects, including impairment to the brain, mushroom body and midgut (Catae *et al.*, 2014;  
55 Oliveira *et al.*, 2014; Peng and Yang, 2016) and decreased learning and memory capacity  
56 (Aliouane *et al.*, 2009; Mengoni and Farina, 2015; Alkassab and Kirchner, 2016). Evidence from  
57 semi-field or field research indicated that neonicotinoids negatively affect foraging activity and  
58 homing flight (Henry *et al.*, 2012; Fischer *et al.*, 2014; Tison *et al.*, 2016). Moreover,  
59 neonicotinoids have been found to affect honeybee immunocompetence (Brandt *et al.*, 2016) and  
60 increase the risk of other stressors such as pathogens (Pettis *et al.*, 2013; Alburaki *et al.*, 2015).

61 Despite the implications for honeybee colonies, little research has so far been carried out into  
62 the molecular effects of neonicotinoids. Christen *et al.* (2016) found that exposure to

63 neonicotinoids changed the transcription of *AChRa1* and 2, *creb*, *pka* and *vitellogenin* in the brain  
64 of honeybees. The latest research from this group (Christen *et al.*, 2017) showed that binary  
65 mixtures of neonicotinoids lead to different transcriptional changes in *nAChR* subunits and  
66 *vitellogenin* than single neonicotinoids, and that transcription was most strongly induced by  
67 thiamethoxam.

68 In the current study, we focused on the second-generation neonicotinoid thiamethoxam  
69 (Maienfisch *et al.*, 2003). Using high-throughput RNA-Seq, we investigated the transcriptome  
70 profile of honeybees after exposure to a sublethal concentration (10 ppb) for 10 days. The  
71 transcriptome profiles were then systematically analyzed by differential gene expression, Gene  
72 Ontology (GO) categories and Kyoto Encyclopedia of Genes and Genomes (KEGG)  
73 pathways. Our study aims to provide a basis to explore the molecular mechanisms of  
74 thiamethoxam and contribute to the understanding of the decline in honeybee populations.

75

## 76 **2. Results**

### 77 2.1. Raw read processing and quantitative gene expression

78 Using high-throughput RNA-Seq, six libraries (SCTH\_1-3 and CK\_1-3) were created from  
79 the two treatments (SCTH and CK). In total, SCTH\_1, SCTH\_2, SCTH\_3, CK\_1, CK\_2 and  
80 CK\_3 generated 43,672,706, 42,805,654, 43,630,710, 43,594,286, 44,650,260 and 43,379,868  
81 usable reads, respectively. After mapping to the reference genome (NCBI: Amel\_4.5) and the  
82 junction database, 38,527,526, 38,026,904, 38,277,904, 39,258,011, 40,153,044 and 37,645,388  
83 total mapped reads were acquired, and the numbers of uniquely mapped reads were 37,673,745,  
84 37,163,425, 37,440,667, 38,121,707, 38,960,068 and 36,686,103. Among these unique reads,  
85 77.58-81.93% were mapped to exon regions (Table S1).

86 We calculated gene activity by counting the reads that mapped to exon regions ( $\geq 3$  per gene).  
87 The average number of genes expressed in SCTH and CK libraries was 11,426 and 11,330  
88 respectively; and 11,150 genes were expressed in both groups (Fig. 1). We also divided gene  
89 expression levels into five grades according to their RPKM (Reads Per Kilo bases per Million  
90 reads) values (Table S2). In each library, 30.22–31.79% of the reads had RPKM values  $< 1$ ,  
91 11.49–12.56% had RPKM values of 1-3, 28.20–29.17% had RPKM values of 3-15, 18.36–20.86%  
92 had values of 15-60 and 8.23–8.95% had RPKM values  $> 60$ . These results showed that a small

93 number of genes were expressed at very high levels but the majority were expressed at low levels,  
94 indicating that the distribution of our DGE dataset was normal.

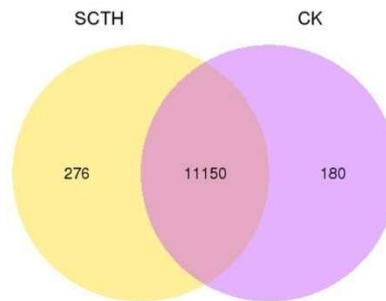

95

96 **Figure 1.**

97 2.2. Differentially-expressed genes between SCTH and CK honeybees

98 In total, 609 differentially-expressed genes (DEGs) were detected, of which 225 (45.2%)  
99 were up-regulated and 334 (54.8%) were down-regulated in the SCTH bees compared with CK  
100 bees (Fig. 2, Table S3). A list of the 20 genes with the most significant differential expression is  
101 shown in Table S4 and of these, 17 were down-regulated and 3 were up-regulated in SCTH  
102 honeybees. The 67 confirmed DEGs are listed in Table S5, and the others have been designated as  
103 hypothetical proteins. We focused here only on those that had previously been confirmed (Table  
104 1).

105 We found that 10 ribosomal protein (RP) genes (*RpL37*, *RpS8*, *RpSA*, *RpL32*, *RpL18A*,  
106 *RpS3A*, *RpS6*, *RpS12*, *RpL13* and *RpL19*) have high expression levels, but were down-regulated in  
107 SCTH honeybees. In contrast, two nicotinic acetylcholine receptors (nAChRs) subunits, *nAChRα9*  
108 and *nAChRβ2*, were up-regulated along with cytochrome P450 6AS5 (*Cyp6as5*).

109 Some genes, for example *defensin 1*, *vitellogenin*, LOC725387 and LOC406093, all have  
110 very high expression levels in both SCTH and CK honeybees, with intensity read copy counts of >  
111 10,000. *Defensin1*, *vitellogenin* and LOC406093 were down-regulated in SCTH honeybees,  
112 whereas LOC725387 was up-regulated.

113 Odorant-binding proteins (OBPs) and chemosensory proteins (CSPs) are believed to be  
114 involved in odor recognition and chemical communication (Pelosi *et al.*, 2006; Sanchez-Gracia *et*  
115 *al.*, 2009). The genes *Obp3*, *Obp17*, *Obp21* and *CSP3* all showed significantly decreased

116 expression in SCTH honeybees. Moreover, three major royal jelly protein (MRJP) coding genes,  
117 *Mrjp*, *Mrjp2* and *Mrjp3*, were down-regulated in the SCTH group. Although the expression level  
118 of a memory-related gene, *NMDA receptor 1 (NRI)*, was relatively low, it was differentially  
119 expressed between SCTH and CK honeybees.

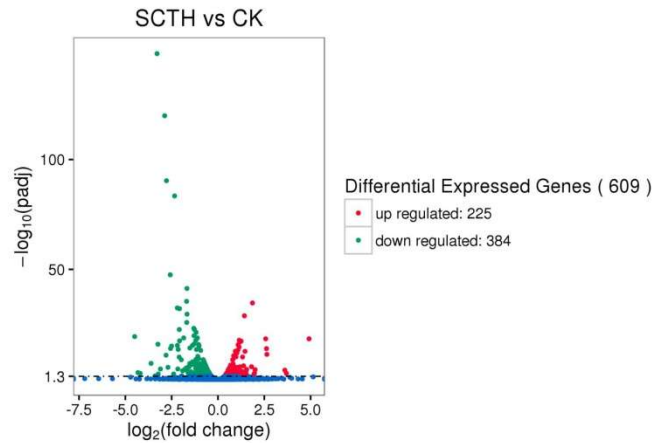

120

121 **Figure 2.**

122 2.3. Gene ontology (GO) enrichment analysis

123 A total of 445 DEGs were enriched for GO terms, including 167 up-regulated and 278  
124 down-regulated genes in SCTH bees (Table S6), and the top 30 most enriched terms are shown in  
125 Fig 3. The genes were divided into three classes: molecular function, cellular components and  
126 biological process. Based on the GO terms for biological process, we found that most genes were  
127 enriched for translation, various metabolic and biosynthetic processes, such as protein metabolism,  
128 cellular protein metabolism, single-organism metabolism, cellular biosynthetic, cellular  
129 macromolecule biosynthetic, macromolecule biosynthetic and organic substance biosynthetic (Fig  
130 3). The main DEGs that were enriched coded for cellular components, including the ribosome,  
131 ribonucleoprotein complex, ribosomal subunit and ribosomal subunit. Most of the genes were  
132 down-regulated in SCTH honeybees (Fig 3, Table S6). In terms of molecular function, the DEGs  
133 played roles in structural constituent of ribosome, structural molecule activity and oxidoreductase  
134 activity (Fig 3).

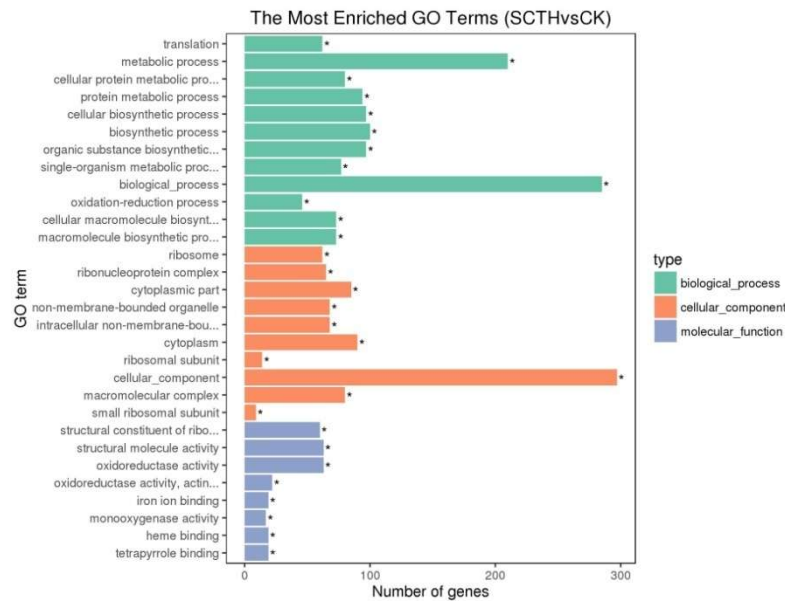

135

136 **Figure 3**

137 2.4 KEGG pathway analysis

138 The KEGG database (<http://www.genome.jp/kegg>) was used to assign functional annotations  
139 to the DEGs. A total of 377 DEGs were identified and mapped to 75 pathways in the KEGG  
140 pathway database (Table S7), including 104 up-regulated and 273 down-regulated genes. Among  
141 these pathways, five were significantly enriched with a corrected  $P$ -value  $\leq 0.05$  (Table 2). These  
142 included the regulation of most genes related to ribosomes, oxidative phosphorylation, tyrosine  
143 metabolism, pentose and glucuronate interconversion and drug metabolism.

144

### 145 3. Discussion

146 The neonicotinoid insecticide thiamethoxam is highly toxic to honeybees with  $LD_{50}$  values in  
147 the range of a few ng per bee. The sublethal effects of thiamethoxam on honeybees have been  
148 extensively studied at many different physiological levels (Aliouane *et al.*, 2009; Henry *et al.*,  
149 2012; Catae *et al.*, 2014; Oliveira *et al.*, 2014; Alburaki *et al.*, 2015). Here we identified 609  
150 differentially-expressed genes (DEGs) in honeybees on exposure to sublethal concentration of  
151 thiamethoxam, including 225 up-regulated genes and 384 down-regulated genes.

152 The results of GO and KEGG analysis showed that the regulation of many DEGs related to

---

153 metabolism, biosynthesis and translation, the ribosome pathway, oxidative phosphorylation  
154 pathway, tyrosine metabolism pathway and pentose and glucuronate interconversions. This  
155 suggests that thiamethoxam mainly affects physiological and developmental processes in  
156 honeybees.

157 Nicotinic acetylcholine receptors (nAChRs) are targets of neonicotinoids and their induction  
158 can produce overt effects such as decreased memory and locomotor capacity (Aliouane *et al.*,  
159 2009; Charreton *et al.*, 2015). Our study showed that subchronic exposure to thiamethoxam  
160 increases the expression of two nAChRs subunits, *nAChR $\alpha$ 9* and *nAChR $\beta$ 2*. These results are  
161 consistent with previous research that thiamethoxam up-regulates expression of *nAChR $\alpha$ 1* and  
162 *nAChR $\alpha$ 2* (Christen *et al.*, 2016; Christen *et al.*, 2017). This indicates a compensatory reaction to  
163 the functional loss of nAChRs due to neonicotinoids (Christen *et al.*, 2016).

164 NMDA glutamate receptors (NMDARs) are composed of NR1 and NR2 subunits and are  
165 known to play an important role in memory formation (Kandel, 2001): injection of NMDA  
166 receptor antagonists led to an impairment of long-term memory (Si *et al.*, 2004). The NR1 subunit  
167 is expressed throughout the honeybee brain and plays a critical role in the functional expression of  
168 NMDARs (Zannat *et al.*, 2006). Müßig *et al.* (2010) reported that inhibiting expression of the *NR1*  
169 subunit in the honeybee brain can impair the formation of mid-term and early long-term memory.  
170 Thus, the thiamethoxam-induced alteration of *NR1* in our study might partly explain the effects on  
171 memory formation.

172 There are two known classes of small soluble proteins in the chemosensilla of insects:  
173 odorant-binding proteins (OBPs) and chemosensory proteins (CSPs). These are believed to be  
174 involved in odor recognition and chemical communication (Pelosi *et al.*, 2006; Sanchez-Gracia *et*  
175 *al.*, 2009), and CSP3 is thought to play a role in brood pheromone transportation (Briand *et al.*,  
176 2002). OBP21 can bind the main components of queen mandibular pheromone as well as farnesol,  
177 a compound used as a trail pheromone (Iovinella *et al.*, 2011). The down-regulation of *CSP3* and  
178 *Obp21* seen in our study suggested a reduced chemosensory ability in challenged honeybees. This  
179 is generally consistent with recent research which indicated that a sublethal dose of the  
180 neonicotinoid imidacloprid decreased the binding affinity of OBP2 to a floral volatile,  $\beta$ -ionone, in  
181 Asiatic honeybees (Li *et al.*, 2015).

182 Neonicotinoids could also affect the immunocompetence of honeybees. A recent study

---

183 reported that exposure to field-realistic concentrations of imidacloprid decreased hemocyte density,  
184 the encapsulation response and antimicrobial action (Brandt *et al.*, 2016). Antimicrobial peptides  
185 are a key component of honeybee innate immunity and include defensin, which is coded by two  
186 different defensin genes (*defensin-1* and *defensin-2*) in the honeybee genome (Evans *et al.*, 2006).  
187 *Defensin-1* has been found to be up-regulated following bacterial challenge (Aronstein and  
188 Saldivar, 2005; Richard *et al.*, 2012), suggesting that it is important in pathogen defense.  
189 Kwakman *et al.* (2010, 2011) found that *defensin-1* is a key antimicrobial compound of honey.  
190 The thiamethoxam-induced down-regulation of *defensin-1* found in our experiment may be  
191 involved in reducing the effectiveness of the immune system.

192 Vitellogenin is also a component of the defense mechanism since it acts as a free-radical  
193 scavenger to protect honeybees from oxidative stress (Amdam *et al.*, 2006; Seehuus *et al.*, 2006).  
194 Down-regulation of vitellogenin can shorten the lifespan of honeybees (Nelson *et al.*, 2007), so  
195 the thiamethoxam-induced decrease in *vitellogenin* expression in our experiment might contribute  
196 to reducing honeybee longevity.

197 Nutrition also plays an important role in honeybee development and longevity. Royal jelly  
198 (RJ) is a natural source of nutrients such as essential amino acids, lipids, vitamins and  
199 acetylcholine. Major Royal Jelly Proteins (MRJPs) constitute around 90% of total RJ protein. So  
200 far, nine MRJPs (MRJP1-MRJP9) and their encoding genes (*Mrjp1-Mrjp9*) have been identified,  
201 and MRJPs1-MRJPs5 have been suggested to have a nutritional function due to their abundance in  
202 RJ protein (Buttstedt *et al.*, 2014). MRJP1 is the predominant MRJP and is more highly expressed  
203 in the hypopharyngeal glands than in other body parts. An MRJP1 monomer, royalactin, was  
204 found to drive queen development through an Egfr-mediated signaling pathway (Kamakura, 2011).  
205 The honeybees used in our experiments were all young worker bees which can produce RJ in the  
206 hypopharyngeal glands. The thiamethoxam-induced down-regulation of *mrjp1*, *mrjp3* and *mrjp4*  
207 might decrease MRJP synthesis and indirectly cause a nutrition reduction in the larvae and queen.

208 However, just like other insects, honeybees have systems to detoxify insecticides.  
209 Cytochrome P450 monooxygenases (P450s) are the main detoxification enzymes which play an  
210 important role in the detoxification and metabolism of xenobiotics and insecticides. A P450 gene,  
211 *CYP6as5*, was induced in our experiment. This gene is a member of the CYP6AS subfamily,  
212 which have been implicated in the metabolism of xenobiotics in honey and pollen (Mao *et al.*,



---

213 2009; Johnson *et al.*, 2012). A recent study showed that *CYP6as5* was also significantly  
214 over-expressed in thiacloprid-treated bees compared with untreated controls, and induced  
215 thiacloprid insensitivity (Alptekin *et al.*, 2016). The P450 gene, *CYP6as5*, seems to play a central  
216 role in neonicotinoid insecticide resistance in honeybees.

217 In summary, using high-throughput RNA-Seq and analysis of differential gene expression,  
218 we detected 609 differentially-expressed genes in honeybees (*Apis mellifera*) after challenge with  
219 a sublethal concentration of thiamethoxam. We identified several genes involved in various  
220 physiological functions, but further studies are needed to confirm the results of this analysis. GO  
221 terms and KEGG pathways were also used to further understand the function of these genes. Our  
222 results provide a reference for understanding the molecular mechanisms of the complex  
223 interactions between neonicotinoid pesticides and honeybees.

224

## 225 **4. Materials and Methods**

### 226 4.1. Honeybee rearing

227 Two frames with sealed broods near adult emergence were taken from a healthy colony at the  
228 Institute of Apiculture Research of Anhui Agriculture University (Hefei, China). The population  
229 had not previously been exposed to pesticide. From July to September 2016 the frames were held  
230 in an incubator under the following conditions:  $35 \pm 1^\circ\text{C}$ , a relative humidity (RH) of  $50 \pm 10\%$   
231 and in darkness. We obtained the newly-emerged honeybees and put them into cages ( $11 \times 10 \times 8$   
232 cm). They were fed with bee bread collected from the same apiary, sucrose–water solution (1:1  
233 w:v), and maintained for three days at  $30 \pm 1^\circ\text{C}$ , a RH of  $70 \pm 10\%$  and in darkness.

234

### 235 4.2. Thiamethoxam preparation and exposure

236 The residues of thiamethoxam in trapped pollen generally ranges from 0.6 to 53.3 ppb  
237 (Mullin *et al.*, 2010; Krupke *et al.*, 2012; Stoner and Eitzer, 2012; Codling *et al.*, 2016;  
238 Sánchez-Hernández *et al.*, 2016), and in honey from 2.5 to 17.2 ppb (Codling *et al.*, 2016;  
239 Sánchez-Hernández *et al.*, 2016). Based on this, a field-realistic level of 10 ppb (Stanley and  
240 Raine, 2016) was selected as the sublethal concentration. A stock solution of thiamethoxam (> 99%  
241 purity, 1000 ppm) was obtained from J&K (Shanghai, China) and prepared using acetone as a

---

242 solvent. A sublethal concentration (10 ppb) of thiamethoxam (SCTH) was prepared in a 50%  
243 sucrose-water solution (1:1 w:v) with a 0.03% final concentration of acetone. A 50%  
244 sucrose-water solution (1:1 w:v) with the same concentration of acetone was also prepared as a  
245 control check (CK).

246 Four-day-old bees were used for the bioassays and each treatment (SCTH or CK) involved  
247 three cages of 60 bees each, all from the same colony. After ten days, we collected all bees and  
248 stored them at -80°C.

249

#### 250 4.3. RNA extraction

251 Pools of 15 bees from each sample were prepared for total RNA extraction using Trizol  
252 reagent (Invitrogen, Carlsbad, CA, USA). RNA concentration was measured using a Qubit® RNA  
253 Assay Kit in a Qubit® 2.0 Fluorometer (Life Technologies, CA, USA) and RNA integrity was  
254 assessed using the RNA Nano 6000 Assay Kit of the Bioanalyzer 2100 system (Agilent  
255 Technologies, CA, USA).

256

#### 257 4.4. Library preparation for transcriptome sequencing

258 A total of 3 µg RNA was to prepare samples. Sequencing libraries were generated using a  
259 NEBNext® Ultra™ RNA Library Prep Kit for Illumina® (NEB, USA) following the  
260 manufacturer's recommendations, and index codes were added to attribute sequences to each  
261 sample. Briefly, mRNA was purified from total RNA using poly-T oligo-attached magnetic beads.  
262 Fragmentation was carried out using divalent cations under a high temperature in NEBNext First  
263 Strand Synthesis Reaction Buffer (5 ×). First strand cDNA was synthesized using a random  
264 hexamer primer and M-MuLV Reverse Transcriptase (RNase H). Second strand cDNA synthesis  
265 was subsequently performed using DNA Polymerase I and RNase H. Remaining overhangs were  
266 converted into blunt ends via exonuclease/polymerase. After adenylation of the 3' ends of DNA  
267 fragments, NEBNext Adaptors with hairpin loop structures were ligated to prepare for  
268 hybridization. cDNA fragments of 150-200 bp in length were selected by purifying library  
269 fragments with an AMPure XP system (Beckman Coulter, Beverly, USA). Then, 3 µl USER  
270 Enzyme (NEB, USA) was used with size-selected, adaptor-ligated cDNA at 37°C for 15 min  
271 followed by 5 min at 95°C. PCR was then performed using a Phusion High-Fidelity DNA

---

272 polymerase, Universal PCR primers and Index (X) Primer. Finally, PCR products were purified  
273 using an AMPure XP system and library quality was assessed using an Agilent Bioanalyzer 2100  
274 system.

275

#### 276 4.5 Clustering and sequencing

277 Clustering of the index-coded samples were performed on a cBot Cluster Generation System  
278 using a TruSeq PE Cluster Kit v3-cBot-HS (Illumina) according to the manufacturer's instructions.  
279 After cluster generation, the library preparations were sequenced on an Illumina Hiseq 4000  
280 platform and 150 bp paired-end reads were generated.

281

#### 282 4.6 Read processing

283 Raw reads in the FASTQ format were first processed through in-house Perl scripts. Clean  
284 reads were obtained by removing low-quality reads or those containing adapters or poly-N. At the  
285 same time, the Q20, Q30 and GC contents were calculated. All downstream analyses were based  
286 on the high-quality clean reads. The index of the honeybee genome (NCBI: Amel\_4.5) was built  
287 using Bowtie v2.2.3, and paired-end clean reads were aligned to the honeybee genome using  
288 TopHat v2.0.12. HTSeq v0.6.1 was used to count the reads mapped to each gene, and then the  
289 FPKM (Fragments Per Kilobase of transcript sequence per Million reads) of each gene was  
290 calculated based on the length of the gene and reads count mapped to it.

291

#### 292 4.7. Differential expression analysis

293 Differential expression analysis was performed using the DESeq R package (2.15.3). DESeq  
294 provides statistical routines to determine differential expression in digital gene expression (DGE)  
295 data using a model based on negative binomial distribution. The resulting *P*-values were adjusted  
296 using the Benjamini and Hochberg approach for controlling the false discovery rate. Genes with  
297 an adjusted *P*-value  $\leq 0.05$  were considered differentially expressed. Finally, Gene Ontology (GO)  
298 enrichment analysis of differentially-expressed genes was carried out using the Goseq R package,  
299 in which gene length bias was corrected. GO terms with corrected *P*-values  $\leq 0.05$  were  
300 considered significantly enriched by differentially-expressed genes. In the Kyoto Encyclopedia of  
301 Genes and Genomes (KEGG) database, we used KOBAS software to test the statistical

---

302 enrichment of differential gene expression in KEGG pathways.

303

304 Competing interests

305 The authors declare no competing or financial interests.

306

307 Author contributions

308 L.S.Y. and T.F.S. conceived and designed the study. T.F.S., Y.F.W and L.Q. performed the experiments. T.F.S.  
309 analyzed data and wrote the manuscript. F.L. edited and revised the manuscript. All authors have read and  
310 approved the final manuscript.

311

312 Funding

313 This work was supported by the Earmarked Fund for China Agriculture Research System (No.  
314 CARS-45-KXJ9).

315

316 References

317 Alburaki, M., Boutin, S., Mercier, P.L., Loublier, Y., Chagnon, M. Derome N. (2015). Neonicotinoid-coated zea  
318 mays seeds indirectly affect honeybee performance and pathogen susceptibility in field trials. *PLoS One*. **10**,  
319 e0125790.

320 Aliouane, Y., El Hassani, A.K., Gary, V., Armengaud, C., Lambin, M. Gauthier, M. (2009). Subchronic exposure of  
321 honeybees to sublethal doses of pesticides: effects on behavior. *Environ. Toxicol. Chem.* **28**, 113–122.

322 Alkassab, A.T., Kirchner, W.H. (2016). Impacts of chronic sublethal exposure to clothianidin on winter honeybees.  
323 *Ecotoxicology* **25**, 1000–1010.

324 Alptekin, S., Bass, C., Nicholls, C., Paine, M.J., Clark, S.J., Field, L., Moores, G.D. (2016). Induced thiacloprid  
325 insensitivity in honeybees (*Apis mellifera* L.) is associated with up-regulation of detoxification genes. *Insect*.  
326 *Mol. Biol.* **25**, 171-180.

327 Amdam, G.V., Simoes, Z.L.P., Hagen, A., Norberg, K., Schröder, K., Mikkelsen, Ø., Kirkwood, T.B.L., Omholt,  
328 S.W. (2004). Hormonal control of the yolk precursor vitellogenin regulates immune function and longevity in  
329 honeybees. *Experimental Gerontology* **39**, 767–773.

330 Aronstein, K., Saldivar, E. (2005). Characterization of a honey bee Toll related receptor gene *Am18w* and its  
331 potential involvement in antimicrobial immune defense. *Apidologie* **36**, 3–14.

332 Blacquièrè, T., Smagghe, G., van Gestel, C.A., Mommaerts, V. (2012). Neonicotinoids in bees: a review on  
333 concentrations, side-effects and risk assessment. *Ecotoxicol* **21**, 973–992.

334 Brandt, A., Gorenflo, A., Siede, R., Meixner, M, Büchler, R. (2016). The neonicotinoids thiacloprid, imidacloprid,

- 
- 335 and clothianidin affect the immunocompetence of honey bees (*Apis mellifera* L.). *J. Insect Physiol.* **86**, 40-47
- 336 Breeze, TD., Bailey, AP., BalcombeK, G., Potts, S.G. (2011). Pollination services in the UK: how important are
- 337 honeybees? *Agric. Ecosyst. Environ.* **142**, 137–143.
- 338 Briand, L., Swasdipan, N., Nespoulous, C., Bezirard, V., Blon, F., Huet, J.C., Ebert, P., Penollet, J.C. (2002).
- 339 Characterization of a chemosensory protein (ASP3c) from honeybee (*Apis mellifera* L.) as a brood pheromone
- 340 carrier. *Eur. J. Biochem.* **269**, 4586–4596.
- 341 Brown, L.A., Ihara, M., Buckingham, S.D., Matsuda, K., Sattelle, D.B. (2006). Neonicotinoid insecticides display
- 342 partial and super agonist actions on native insect nicotinic acetylcholine receptors. *J. Neurochem.* **99**, 608–615.
- 343 Buttstedt, A., Moritz, R.F., Erler, S. (2014). Origin and function of the major royal jelly proteins of the honeybee
- 344 (*Apis mellifera*) as members of the yellow gene family. *Biol Rev Camb Philos Soc.* **89**, 255-69.
- 345 Catae, A.F., Roat, T.C., De Oliveira, R.A., Nocelli, R.C.F., Malaspina, O. (2014). Cytotoxic effects of
- 346 thiamethoxam in the midgut and malpighian tubules of Africanized *Apis mellifera* (Hymenoptera: Apidae).
- 347 *Microsc. Res. Tech.* **77**, 274-281.
- 348 Charreton, M., Decourtye, A., Henry, M., Rodet, G., Sandoz, J.C., Charnet, P., Collet, C. (2015). A locomotor
- 349 deficit induced by sublethal doses of pyrethroid and neonicotinoid insecticides in the honeybee *Apis mellifera*.
- 350 *PLoS One* **10**, e0144879.
- 351 Chauzat, MP., Cauquil, L., Roy, L., Franco, S., Hendrikx, P., Ribiere-Chabert, M. (2013). Demographics of the
- 352 European apicultural industry. *PLoS One* **8**, e79018.
- 353 Christen, V., Mittner, F., Fent, K. (2016). Molecular effects of neonicotinoids in honeybees (*Apis mellifera*).
- 354 *Environ. Sci. Technol.* **50**, 4071-4081.
- 355 Christen, V., Mittner, F., Fent, K. (2017). Binary mixtures of neonicotinoids show different transcriptional changes
- 356 than single neonicotinoids in honeybees (*Apis mellifera*). *Environmental Pollution* **220**, 1264-1270.
- 357 Codling G., Al Naggar, N.Y., Giesy, J.P., Robertson, A.J. (2016). Concentrations of neonicotinoid insecticides in
- 358 honey, pollen and honeybees (*Apis mellifera* L.) in central Saskatchewan, Canada. *Chemosphere* **144**,
- 359 2321-2328.
- 360 Cresswell, J.E. (2011). A meta-analysis of experiments testing the effects of a neonicotinoid insecticide
- 361 (imidacloprid) on honey bees. *Ecotoxicology* **20**, 149–57.
- 362 Danihlík, J., Aronstein, K., Petřivalský, M. (2015). Antimicrobial peptides: a key component of honey bee innate
- 363 immunity. *J. Apicult Res.* **2**, 1-14.
- 364 De Gregorio, E., Spellman, P.T., Tzou, P., Rubin, G.M., Lemaitre, B. (2002). The Toll and Imd pathways are the

- 
- 365 major regulators of the immune response in *Drosophila*. *EMBO J.* **21**, 2568–2579.
- 366 Degrandi-Hoffman, G., Hagler, J. (2000). The flow of incoming nectar through a honey bee (*Apis mellifera* L.)  
367 colony as revealed by a protein marker. *Insectes Sociaux* **47**, 302–306.
- 368 Evans, J.D., Aronstein, K., Chen, Y.P., Hetru, C., Imler, J.L., Jiang, H., Kanost M., Thompson G.J., Zou, Z.,  
369 Hultmark, D. (2006). Immune pathways and defence mechanisms in honey bees *Apis mellifera*. *Insect. Mol.*  
370 *Biol.* **15**, 645–656.
- 371 Fischer, J., Muller, T., Spatz, A.K., Greggers, U., Grunewald, B., Menzel, R. (2014). Neonicotinoids interfere with  
372 specific components of navigation in honeybees. *PLoS One* **9**, e91364.
- 373 Goulson, D. (2013). An overview of the environmental risks posed by neonicotinoid insecticides. *J. Appl. Ecol.* **50**,  
374 977–987.
- 375 Goulson, D., Nicholls, E., Botías, C., Rotheray, E.L. (2015). Bee declines driven by combined stress from  
376 parasites, pesticides, and lack of flowers. *Science* **347**, 1255957.
- 377 Henry, M., Beguin, M., Requier, F., Rollin, O., Odoux, J.F., Aupinel, P. (2012). A common pesticide decreases  
378 foraging success and survival in honey bees. *Science* **336**, 348–50.
- 379 Iovinella, I., Dani, F.R., Niccolini, A., Sagona, S., Michelucci, E., Gazzano, A., Turillazzi, S., Felicioli, A., Pelosi,  
380 P. (2011). Differential Expression of odorant-binding proteins in the mandibular glands of the honey bee  
381 according to caste and age. *J. Proteome Re.* **10**, 3439-3449.
- 382 Johnson, R.M., Ellis, MD., Mullin, CA., Frazier, M. (2010). Pesticides and honey bee toxicity—USA. *Apidologie*  
383 **41**, 312–31.
- 384 Johnson, R.M., Mao, W., Pollock, H.S., Niu, G., Schuler, M.A., Berenbaum, M.R. (2012). Ecologically appropriate  
385 xenobiotics induce cytochrome P450s in *Apis mellifera*. *PLoS One* **7**, e31051.
- 386 Kamakura, M. (2011). Royalactin induces queen differentiation in honeybees. *Nature* **473**, 478–483.
- 387 Kandel, E.R. (2001). The molecular biology of memory storage: a dialogue between genes and synapses. *Science*  
388 **294**, 1030 -1038.
- 389 Krupke, C.H., Hunt, G.J., Eitzer, B.D., Andino, G., Given, K. (2012). Multiple routes of pesticide exposure for  
390 honey bees living near agricultural fields. *PLoS One* **7**, e29268.
- 391 Kwakman, P.H.S., te Velde, A.A., de Boer, L., Speijer, D., Vandenbroucke-Grauls, C.M.J.E., Zaat, S.A.J. (2010).  
392 How honey kills bacteria. *FASEB Journal* **24**, 2576–2582.
- 393 Kwakman, P.H.S., te Velde, A.A., de Boer, L., Vandenbroucke-Grauls, C.M.J.E., Zaat, S.A.J. (2011). Two major  
394 medicinal honeys have different mechanisms of bactericidal activity. *PLoS One* **6**, e17709.

- 
- 395 Laurino, D., Porporato, M., Patetta, A., Manino, A. (2011). Toxicity of neonicotinoid insecticides to honey bees:  
396 laboratory tests. *Bulletin of Insectology* **64**, 107-113.
- 397 Li, H.L., Wu, F., Zhao, L., Tan, J., Jiang, H.T., Hu, F.L. (2015). Neonicotinoid insecticide interact with honeybee  
398 odorant-binding protein: implication for olfactory dysfunction. *Int. J. Biol. Macromol.* **81**, 624–630.
- 399 Maienfisch, P., Huerlimann, H., Rindlisbacher, A., Gsell, L., Dettwiler, H., Haettenschwiler, J., Sieger, E., Walti,  
400 M. (2003). The discovery of thiamethoxam: a second-generation neonicotinoid. *Pest. Manag. Sci.* **57**, 165-176.
- 401 Mao, W., Rupasinghe, S.G., Johnson, R.M., Zangerl, A.R., Schuler, M.A., Berenbaum, M.R. (2009). Quercetin-  
402 metabolizing CYP6AS enzymes of the pollinator *Apis mellifera* (Hymenoptera: Apidae). *Comp Biochem*  
403 *Physiol B Biochem Mol Biol.* **154**, 427-434.
- 404 Mengoni, G.C., Farina, W.M. (2015). Effects of sublethal doses of imidacloprid on young adult honeybee  
405 behaviour. *PLoS One.* **10**, e0140814.
- 406 Mullin, C.A., Frazier, M., Frazier, J.L., Ashcraft, S., Simonds, R., vanEngelsdorp, D., Pettis, J.S. (2010). High  
407 levels of miticides and agrochemicals in north American apiaries: implications for honey bee health. *PLoS One.*  
408 **5**, e9754.
- 409 Müssig, L., Richlitzki, A., Rößler, R., Eisenhardt, D., Menzel, R., Leboulle, G. (2010). Acute disruption of the  
410 NMDA receptor subunit NR1 in the honeybee brain selectively impairs memory formation. *J. Neurosci.* **30**,  
411 7817–7825.
- 412 Neumann, P., Carreck, N.L. (2010). Honey bee colony losses. *J. Apic. Res.* **49**, 1–6.
- 413 Nelson, C.M., Ihle, K.E., Fondrk, M.K., Page, R.E., Amdam, G.V. (2007). The gene vitellogenin has multiple  
414 coordinating effects on social organization. *PLoS Biology* **5**, e62.
- 415 Oliveira, R.A., Roat, T.C., Carvalho, S.M., Malaspina, O. (2014). Side-effects of thiamethoxam on the brain and  
416 midgut of the Africanized honeybee *Apis mellifera* (Hymenoptera: Apidae). *Environ Toxicol.* **29**, 1122-1133.
- 417 Pelosi, P., Zhou, J.J., Ban, L.P., Calvello, M. (2006). Soluble proteins in insect chemical communication. *Cell.*  
418 *Mol. Life. Sci.* **63**, 1658-1676.
- 419 Peng, Y.C., Yang, E.C. (2016). Sublethal dosage of imidacloprid reduces the microglomerular density of honey bee  
420 mushroom bodies. *Sci. Rep.* **6**, 19298.
- 421 Pettis, J.S., Lichtenberg, E.M., Andree, M., Stitzinger, J., Rose, R., van Engelsdorp, D. (2013). Crop pollination  
422 exposes honey bees to pesticides which alters their susceptibility to the gut pathogen *Nosema ceranae*. *PLoS*  
423 *One.* **98**, e70182.
- 424 Potts, S., Biesmeijer, J.C., Kremen, C., Neumann, P., Schweiger, O., Kunin, W.E. (2010). Global pollinator

- 
- 425 declines: trends, impacts and drivers. *Trends. Ecol. Evol.* **25**, 345–353.
- 426 Richard, F.J., Holt, H.L., Grozinger, C.M. (2012). Effects of immunostimulation on social behavior, chemical  
427 communication and genome-wide gene expression in honey bee workers (*Apis mellifera*). *BMC Genomics* **13**,  
428 558.
- 429 Sánchez-Hernández, L., Hernández-Domínguez, D., Martín, M.T., Nozal, M.J., Higes, M., Bernal Yagüe, J.L.  
430 (2016). Residues of neonicotinoids and their metabolites in honey and pollen from sunflower and maize seed  
431 dressing crops. *J. Chromatogr A.* **1428**, 220-227.
- 432 Sanchez-Gracia, A., Vieira, F.G., Rozas, J. (2009). Molecular evolution of the major chemosensory gene families  
433 in insects. *Heredity* **103**, 208-216.
- 434 Schmuck, R., Lewis, G. (2016). Review of field and monitoring studies investigating the role of nitro-substituted  
435 neonicotinoid insecticides in the reported losses of honey bee colonies (*Apis mellifera*). *Ecotoxicology.* **25**,  
436 1617–1629.
- 437 Seehuus, S.C., Norberg, K., Gimsa, U., Krekling, T., Amdam, G.V. (2006). Reproductive protein protects sterile  
438 honeybee workers from oxidative stress. *PNAS.* **103**, 962–967.
- 439 Si, A., Helliwell, P., Maleszka, R. (2004). Effects of NMDA receptor antagonists on olfactory learning and  
440 memory in the honeybee (*Apis mellifera*). *Pharmacol. Biochem. Behav.* **77**, 191–197.
- 441 Stanley, D.A., Raine, N.E. (2016). Chronic exposure to a neonicotinoid pesticide alters the interactions between  
442 bumblebees and wild plants. *Functional Ecology* **30**, 1132-1139.
- 443 Stoner, K.A., Eitzer, B.D. (2012). Movement of soil-applied imidacloprid and thiamethoxam into nectar and pollen  
444 of squash (*Cucurbita pepo*). *PLoS One.* **7**, e39114.
- 445 Tison, L., Hahn, M.L., Holtz, S., Rossner, A., Greggers, U., Bischoff, G., Menzel, R. (2016). Honeybees' behavior  
446 is impaired by chronic exposure to the neonicotinoid thiacloprid in the field. *Environ. Sci. Technol.* **50**,  
447 7218-7227.
- 448 Tomizawa, M., Casida, J.E. (2005). Neonicotinoid insecticide toxicology: mechanisms of selective action. *Annu*  
449 *Rev. Pharmacol. Toxicol.* **45**, 247-68.
- 450 VanEngelsdorp, D., Speybroeck, N., Evans, J.D., Nguyen, B.K., Mullin, C., Frazier, M., Frazier, J., Cox-Foster, D.,  
451 Chen, Y., Tarpy, D.R. et al. (2010). Weighing risk factors associated with bee colony collapse disorder by  
452 classification and regression tree analysis. *J. Econ Entomol.* **103**, 1517–23.
- 453 Zannat, T., Locatelli, F., Rybak, J., Menzel, R., Leboulle, G. (2006). Identification and localisation of the NR1  
454 sub-unit homologue of the NMDA glutamate receptor in the honeybee brain. *Neurosci Lett.* **398**, 274 –279.



455

456 **Figure legends**

457

458 **Fig.1. The average number of genes specifically expressed in SCTH and CK libraries, shown**  
459 **as number of genes expressed in each class.** Honeybees exposure to sublethal concentration of  
460 thiamethoxam (10ppb) over 10 days, with acetone as the control check. Each library (SCTH or  
461 CK) involved three biological replicates of 15 bees each. SCTH: sublethal concentration of  
462 thiamethoxam; CK: control check.

463

464 **Fig.2. Volcano plot of differentially-expressed genes between SCTH and CK honeybees (*Apis***  
465 ***mellifera*).** Each treatment (SCTH or CK) involved three biological replicates of 15 bees each.  
466 Genes with an adjusted *P*-value (*p*<sub>adj</sub>) ≤ 0.05 (FDR correction method) were considered  
467 differentially expressed between SCTH and CK bees. Red points: up-regulated genes in SCTH  
468 bees; Green points: down-regulated genes in SCTH bees; Blue points: no significant difference.  
469 SCTH: sublethal concentration of thiamethoxam; CK: control check.

470

471 **Fig.3. GO enrichment analysis of the differentially-expressed genes (DEGs) between SCTH**  
472 **and CK honeybees (*Apis mellifera*).** Green bars: DEGs were enriched for biological process;  
473 Orange bars: DEGs were enriched for cellular component; Purple bars: DEGs were enriched for  
474 molecular function. Asterisk indicates GO terms were significantly enriched by DEGs (corrected  
475 *P*-values ≤ 0.05, FDR correction method). SCTH: sublethal concentration of thiamethoxam; CK:  
476 control check.

477

478 **Table 1.** Information on selected differentially-expressed genes between SCTH and CK honeybees (*Apis*  
479 *mellifera*), corrected *P*-value ≤ 0.05.

| Gene                | Regulation (SCTH VS CK) | Function                                                                                                                  |
|---------------------|-------------------------|---------------------------------------------------------------------------------------------------------------------------|
| <i>NRI</i>          | Up                      | Memory formation (Müßig <i>et al.</i> , 2010)                                                                             |
| <i>CSP3</i>         | Down                    | Brood pheromone transportation (Briand <i>et al.</i> , 2002)                                                              |
| <i>Obp21</i>        | Down                    | Solubilization and release of semiochemicals (Iovinella <i>et al.</i> , 2011)                                             |
| <i>defensin-1</i>   | Down                    | Fight against pathogens (Aronstein and Saldivar, 2005; Kwakman <i>et al.</i> , 2010, 2011; Richard <i>et al.</i> , 2012 ) |
| <i>vitellogenin</i> | Down                    | Regulation of lifespan (Amdam <i>et al.</i> , 2006; Nelson <i>et al.</i> , 2007)                                          |

---

|                |      |                                                                     |
|----------------|------|---------------------------------------------------------------------|
|                |      | Nutritional (Buttstedt <i>et al.</i> , 2014); Caste differentiation |
| <i>Mrjp1</i>   | Down | (Kamakura, 2011)                                                    |
| <i>Mrjp3</i>   | Down | Nutritional (Buttstedt <i>et al.</i> , 2014)                        |
| <i>Mrjp4</i>   | Down |                                                                     |
| <i>Cyp6as5</i> | Up   | Thiacloprid resistance (Alptekin <i>et al.</i> , 2016)              |
| <i>nAChRa9</i> | Up   | -                                                                   |
| <i>nAChRβ2</i> | Up   | -                                                                   |

---

480 **SCTH: sublethal concentration of thiamethoxam; CK: control check. Up: up-regulated in SCTH bees;**  
 481 **Down: down-regulated in SCTH bees.**

482

483 **Table 2.** The five significantly enriched pathways, corrected  $P$ -value  $\leq 0.05$ .

---

| Pathways                                 | Pathway ID | Gene number | Corrected $P$ -value |
|------------------------------------------|------------|-------------|----------------------|
| Ribosome                                 | ame03010   | 64          | 1.1001522981e-25     |
| Oxidative phosphorylation                | ame00190   | 19          | 0.0286819305139      |
| Tyrosine metabolism                      | ame00350   | 6           | 0.042425360978       |
| Pentose and glucuronate interconversions | ame00040   | 7           | 0.0286819305139      |
| Drug metabolism - other enzymes          | ame00983   | 7           | 0.0369487673874      |

---

484
